# Supplementary material for: Acidified Nitrite Accelerates Wound Healing in Type 2 Diabetic Male Rats: A Histological and Stereological Evaluation
Source: MDPI journal article supplement (doi:10.3390/molecules26071872), 2021-03-26
Supplement: s1 [file s1]

*Supplementary Materials*

# **Acidified Nitrite Accelerates Wound Healing in Type 2 Diabetic Male Rats: A Histological and Stereological Evaluation**

**Hamideh Afzali <sup>1,2</sup>, Mohammad Khaksari <sup>1</sup>, Sajad Jeddi <sup>2</sup>, Khosrow Kashfi <sup>3</sup>, Mohammad-Amin Abdollahifar <sup>4,\*</sup> and Asghar Ghasemi <sup>2,\*</sup>**

<sup>1</sup> Endocrinology and Metabolism Research, and Physiology Research Centers, Kerman University of Medical Sciences, Kerman, 7616913555, Iran; hamide\_afzali@yahoo.com (H.A.); mkhaksari@kmu.ac.ir (M.K.).

<sup>2</sup> Endocrine Physiology Research Center, Research Institute for Endocrine Sciences, Shahid Beheshti University of Medical Sciences, Tehran, 1985717413, Iran; Sajad.jeddi@sbmu.ac.ir

<sup>3</sup> Department of Molecular, Cellular and Biomedical Sciences, Sophie Davis School of Biomedical Education, City University of New York School of Medicine, New York, NY 10031, USA; Kashfi@med.cuny.edu

<sup>4</sup> Department of Biology and Anatomical Sciences, Faculty of Medicine, Shahid Beheshti University of Medical Sciences, Tehran, 1985717413, Iran

\* Correspondence: abdollahima@sbmu.ac.ir (M.-A.A.); Tel.: +982123872555; Ghasemi@endocrine.ac.ir (A.G.); Tel.: +982122432489

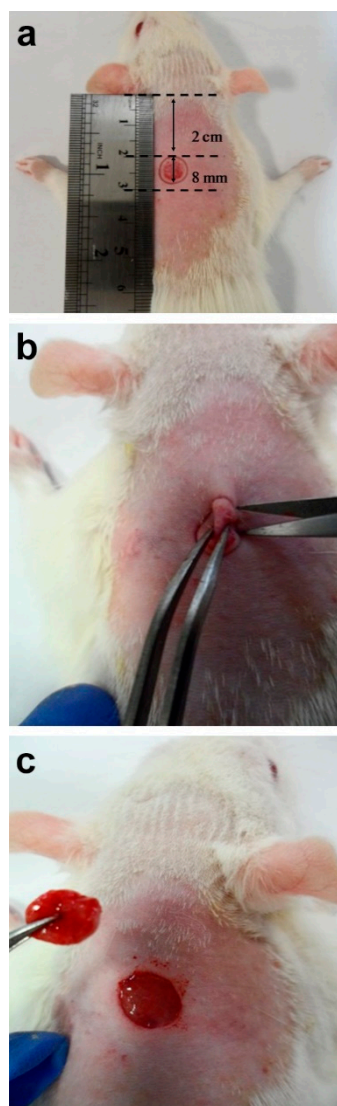

**Figure S1.** Wound induction. An 8 mm punch is used to mark the location of the excisional wound (2 cm below the ears) (a). Forceps retract the skin outward and scissors are used to sharply excise a circular piece of skin down through the panniculus carnosus (b). One full-thickness excisional wound (c).
